# Supplementary material for: The Combination of CD147 and MMP-9 Serum Levels Is Identified as Novel Chemotherapy Response Markers of Advanced Non-Small-Cell Lung Cancer
Source: Hindawi journal article supplement (doi:10.1155/2020/8085053), 2020-04-24
Supplement: f1 [file 8085053.f1.zip]

## Supplementary material

**Table S1 Univariable analyses for tumor response in NSCLC cases after the various cycles of chemotherapy**

| Variable            | After the first cycle |          | After the second cycle |          | After the fourth cycle |          |
|---------------------|-----------------------|----------|------------------------|----------|------------------------|----------|
|                     | HR (95%CI)            | <i>P</i> | HR (95%CI)             | <i>P</i> | HR (95%CI)             | <i>P</i> |
| Gender              | 0.58(0.06-5.51)       | 0.638    | 2.04(0.39–10.85)       | 0.404    | 2.22(0.51-9.65)        | 0.286    |
| Male                |                       |          |                        |          |                        |          |
| Female              |                       |          |                        |          |                        |          |
| Age(years)          | 1.61(0.29-8.86)       | 0.584    | 0.63(0.18-2.28)        | 0.483    | 0.43(0.11-1.76)        | 0.242    |
| ≤60                 |                       |          |                        |          |                        |          |
| >60                 |                       |          |                        |          |                        |          |
| Smoking status      | 0.74(0.08-7.08)       | 0.794    | 1.77(0.33-9.52)        | 0.507    | 3.94(0.88-17.73)       | 0.074    |
| Never               |                       |          |                        |          |                        |          |
| Smoker              |                       |          |                        |          |                        |          |
| Baseline ECOG PS    | 2.15(0.20-23.21)      | 0.528    | 0.59(0.03-1.30)        | 0.021    | 1.13(0.31-3.45)        | 0.783    |
| 0-1                 |                       |          |                        |          |                        |          |
| ≥2                  |                       |          |                        |          |                        |          |
| T status            | 0.47(0.08-2.60)       | 0.386    | 1.30(0.35-4.84)        | 0.693    | 0.63(0.16-2.42)        | 0.499    |
| T1+ T2              |                       |          |                        |          |                        |          |
| T3+ T4              |                       |          |                        |          |                        |          |
| N status            | 2.48(0.91-14.31)      | 0.690    | 0.76(0.04-3.22)        | 0.035    | 0.70(0.13-3.70)        | 0.673    |
| N0                  |                       |          |                        |          |                        |          |
| N1+ N2+ N3          |                       |          |                        |          |                        |          |
| M status            | 1.35(0.14-12.92)      | 0.794    | 0.66(0.12-3.60)        | 0.630    | 2.48(0.25-24.65)       | 0.439    |
| M0                  |                       |          |                        |          |                        |          |
| M1                  |                       |          |                        |          |                        |          |
| TNM stage           | 1.35(0.14-12.92)      | 0.794    | 0.66(0.12-3.60)        | 0.630    | 2.48(0.25-24.65)       | 0.439    |
| III                 |                       |          |                        |          |                        |          |
| IV                  |                       |          |                        |          |                        |          |
| variations of CD147 | 0.23(0.04-1.42)       | 0.115    | 14.85(2.79-70.06)      | 0.002    | 3.20(0.82-12.53)       | 0.045    |
| increased           |                       |          |                        |          |                        |          |
| decreased           |                       |          |                        |          |                        |          |
| variations of MMP-9 | 6.51(0.98-20.18)      | 0.021    | 14.29(3.09-65.99)      | 0.001    | 7.00(1.56-31.52)       | 0.011    |
| increased           |                       |          |                        |          |                        |          |
| decreased           |                       |          |                        |          |                        |          |

**Table S2 Multivariable analyses for tumor response in NSCLC cases after the various cycles of chemotherapy**

| Variable            | After the first cycle |          | After the second cycle |          | After the fourth cycle |          |
|---------------------|-----------------------|----------|------------------------|----------|------------------------|----------|
|                     | HR (95%CI)            | <i>P</i> | HR (95%CI)             | <i>P</i> | HR (95%CI)             | <i>P</i> |
| Baseline ECOG PS    |                       |          | 14.29(3.09-35.98)      | 0.285    |                        |          |
| 0-1                 |                       |          |                        |          |                        |          |
| ≥2                  |                       |          |                        |          |                        |          |
| N status            |                       |          | 0.32(0.00-1.51)        | 0.138    |                        |          |
| N0                  |                       |          |                        |          |                        |          |
| N1+ N2+ N3          |                       |          |                        |          |                        |          |
| variations of CD147 |                       |          | 34.29(3.04-386.73)     | 0.004    | 5.51(0.98-30.88)       | 0.052    |
| increased           |                       |          |                        |          |                        |          |
| decreased           |                       |          |                        |          |                        |          |
| variations of MMP-9 | 0.000                 | 0.997    | 32.83(3.23-333.90)     | 0.003    | 12.00(1.98-72.89)      | 0.007    |
| increased           |                       |          |                        |          |                        |          |
| decreased           |                       |          |                        |          |                        |          |
