# Supplementary material for: The Combination of CD147 and MMP-9 Serum Levels Is Identified as Novel Chemotherapy Response Markers of Advanced Non-Small-Cell Lung Cancer
Source: Dis Markers. 2020 Apr 24;2020:8085053. doi: 10.1155/2020/8085053 (PMC7196144; doi:10.1155/2020/8085053)
Supplement: Supplementary Materials — Table S1: univariable analyses for tumor response in NSCLC cases after the various cycles of chemotherapy. Table S2: multivariable analyses for tumor response in NSCLC cases after the various cycles of chemotherapy. [file 8085053.f1.zip]

Archive with 3 entries (3 files):
- 8085053-Supplementary material -1.docx
- 8085053-Supplementary material-2.docx
- mat.8085053.v2.pdf
